# Supplementary material for: Dynamic Double Cross-Linked Self-Healing Polysaccharide Hydrogel Wound Dressing Based on Schiff Base and Thiol-Alkynone Reactions
Source: MDPI journal article supplement (doi:10.3390/ijms232213817), 2022-11-10
Supplement: s1 [file s1]

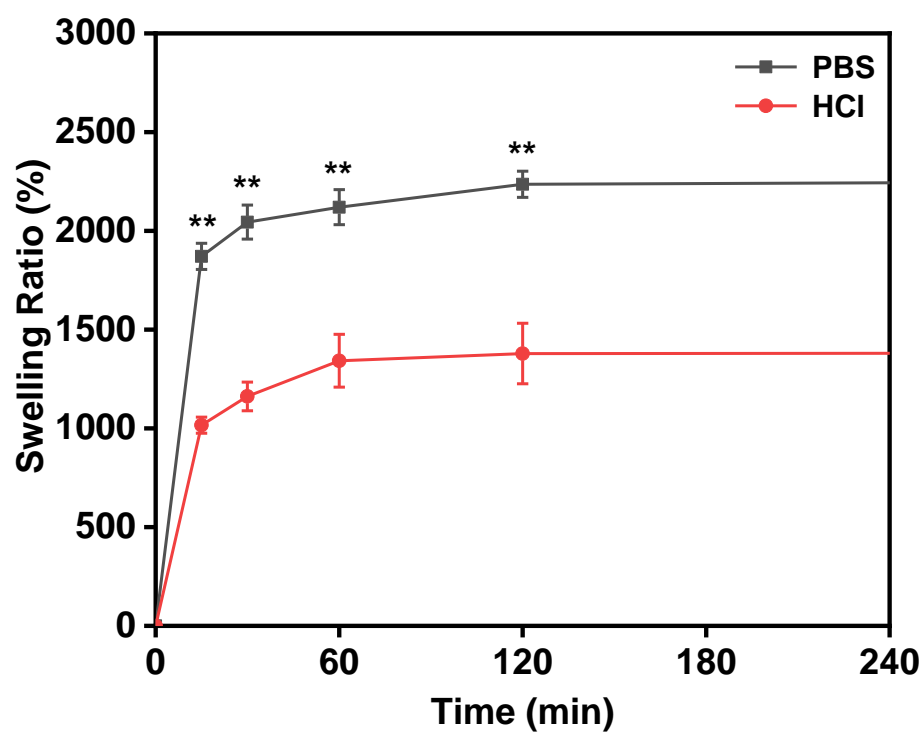

Figure S1. Swelling ratio of SH-CMCS/OSA hydrogel in PBS and HCl at 37°C (\*\* $p < 0.01$ ).

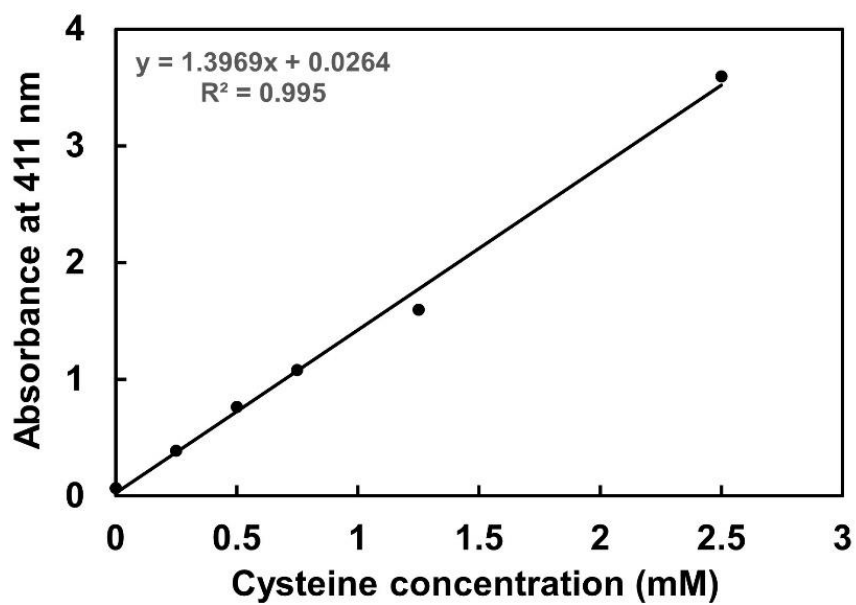

Figure S2. Cysteine standard curve.
